# Supplementary material for: Intranasal fentanyl spray versus intravenous opioids for the treatment of severe pain in patients with cancer in the emergency department setting: A randomized controlled trial
Source: PubMed Central journal article supplement (PMC7351205; doi:10.1371/journal.pone.0235461), 2020-07-10
Supplement: pone.0235461.s004.pdf [file pone.0235461.s004.pdf]

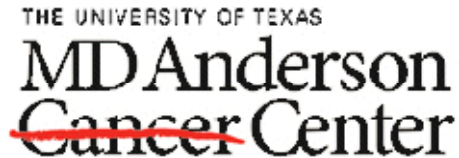

## Protocol Page

A randomized trial to compare fentanyl nasal spray with intravenous opioids to treat severe pain in cancer patients in the emergency department setting.

2015-0086

### Core Protocol Information

|                            |                                                                                                                                                          |
|----------------------------|----------------------------------------------------------------------------------------------------------------------------------------------------------|
| <b>Short Title</b>         | Compare fentanyl nasal spray with intravenous opioids to treat severe pain                                                                               |
| <b>Study Chair:</b>        | Sai-Ching J. Yeung                                                                                                                                       |
| <b>Additional Contact:</b> | Denise M. Langabeer<br>Jessica A. Nollkamper<br>Valda Page                                                                                               |
| <b>Department:</b>         | Emergency Medicine                                                                                                                                       |
| <b>Phone:</b>              | 713-745-9911                                                                                                                                             |
| <b>Unit:</b>               | 1468                                                                                                                                                     |
| <b>Full Title:</b>         | A randomized trial to compare fentanyl nasal spray with intravenous opioids to treat severe pain in cancer patients in the emergency department setting. |
| <b>Protocol Type:</b>      | Standard Protocol                                                                                                                                        |
| <b>Protocol Phase:</b>     | N/A                                                                                                                                                      |
| <b>Version Status:</b>     | Activated -- Closed to new patient entry as of 08/15/2018                                                                                                |
| <b>Version:</b>            | 08                                                                                                                                                       |
| <b>Submitted by:</b>       | Sai-Ching J. Yeung--8/15/2018 11:43:00 AM                                                                                                                |
| <b>OPR Action:</b>         | Accepted by: Inar Y. Graur -- 8/15/2018 4:00:23 PM                                                                                                       |

Which Committee will review this protocol?

The Clinical Research Committee - (CRC)

## Protocol Body

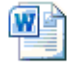

Lazanda RCT 03202015.docx

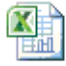

Departmental Prioritization List.xlsx
