# Supplementary material for: Intranasal fentanyl spray versus intravenous opioids for the treatment of severe pain in patients with cancer in the emergency department setting: A randomized controlled trial
Source: PubMed Central journal article supplement (PMC7351205; doi:10.1371/journal.pone.0235461), 2020-07-10
Supplement: pone.0235461.s006.pdf [file pone.0235461.s006.pdf]

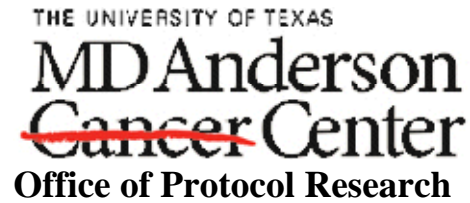

Institutional Review Board (IRB)  
Unit 1637  
Phone 713-792-2933  
Fax 713-794-4589

---

To: Sai-Ching J. Yeung 09/14/2015  
From: Kara M. Seales  
CC: Cristina Gonzales, Denise M. Langabeer, Tiffany D. Mitchell, Evanna L. Thompson, Jason M. Reed, Sapna R. Amin, Mariam Hanna  
MDACC Protocol ID #: 2015-0086  
Protocol Title: A randomized trial to compare fentanyl nasal spray with intravenous opioids to treat severe pain in cancer patients in the emergency department setting.  
Version: 04  
Subject: Activation and Distribution of Protocol 2015-0086

This study is now active and ready for patient accrual.

The Informed Consent(s) will be available in the Informed Consent Printer Database within 30 minutes.

In the event of any questions or concerns, please contact the sender of this message at (713) 792-2933.

Kara M. Seales 09/14/2015 03:49:55 PM
